# Supplementary material for: Synthesis and ultrafast spectroscopic study of new [6,6]methanofullerenes
Source: Royal Society of Chemistry journal article supplement (doi:10.1039/c6ra01189f), 2016-01-01

# Synthesis and ultrafast spectroscopic study of new [6,6]methanofullerenes

SamyaNaqvi,<sup>a#</sup> Neha Gupta,<sup>a#</sup> NeelamKumari,<sup>a#</sup> MukeshJewariya,<sup>b,c</sup> PramodKumar,<sup>d</sup>  
Rachana Kumar<sup>a\*</sup>, Suresh Chand<sup>a</sup>

## \*Corresponding author

CSIR-National Institute of Solar Energy  
Organic and Hybrid Solar Cells Group,  
Physics of Energy Harvesting Division,  
National Physical Laboratory,  
New Delhi-110012 India  
Email: rachanak@nplindia.org  
Phone: +91-11-4560-8620  
Fax: +91-11-4560-9310

<sup>a</sup>CSIR-National Institute of Solar Energy, Organic and Hybrid Solar Cells Group, Physics of Energy Harvesting Division, CSIR-National Physical Laboratory, New Delhi-110012 India

<sup>b</sup>Ultrafast Optoelectronics and Terahertz Photonics Lab, Physics of Energy Harvesting Division, CSIR-National Physical Laboratory, New Delhi 110012, India

<sup>c</sup>Center for Quantum-Beam-based Radiation Research, Korea Atomic Energy Research Institute (KAERI), Korea

<sup>d</sup>Magnetic and Spintronic Laboratory, Indian Institute of Information Technology Allahabad, Allahabad 211012, India. E-mail: pkumar@iiita.ac.in

<sup>#</sup>Academy of Scientific and Innovative Research, New Delhi

Product **1**  $^1\text{H}$  NMR

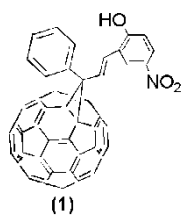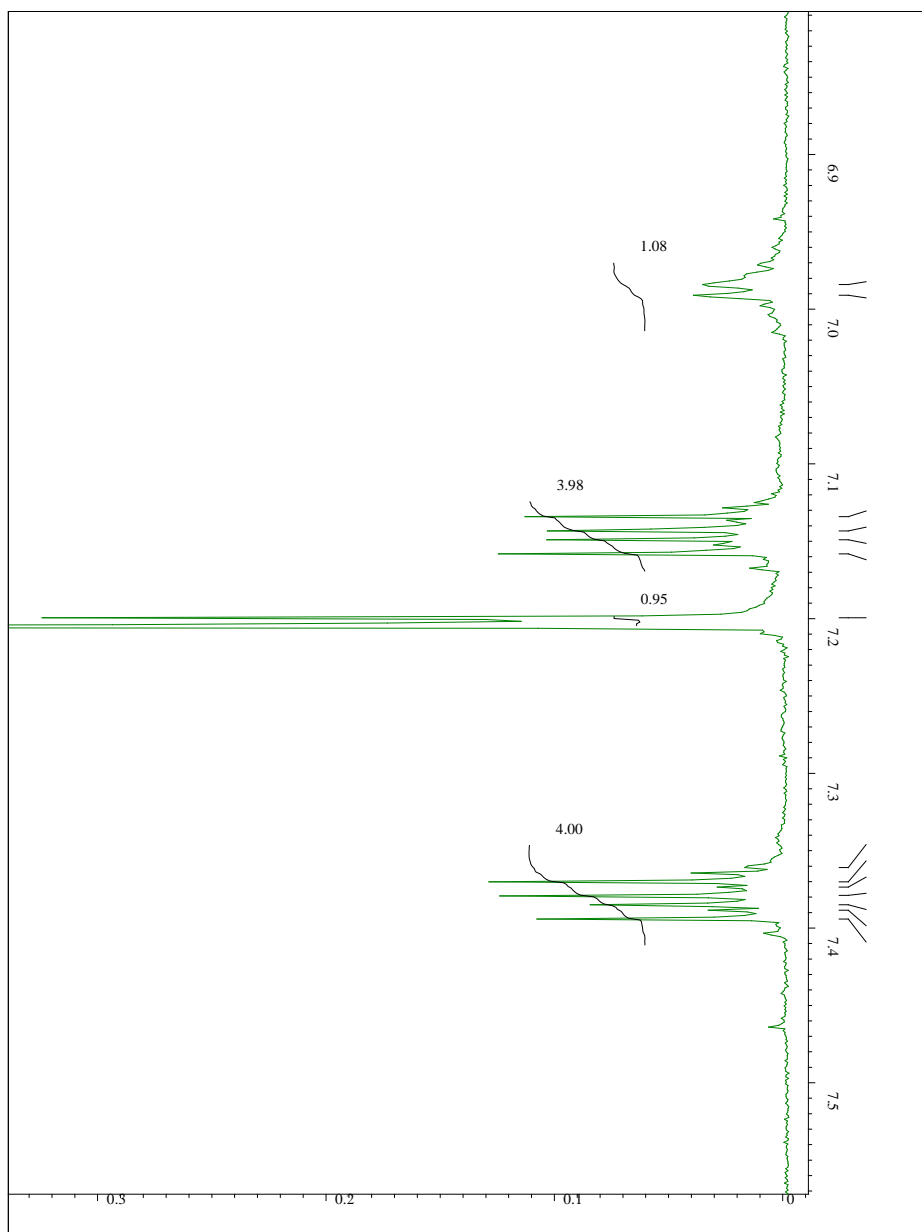

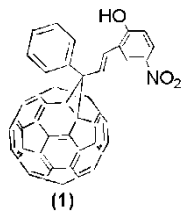

Product 1  $^{13}\text{C}$  NMR

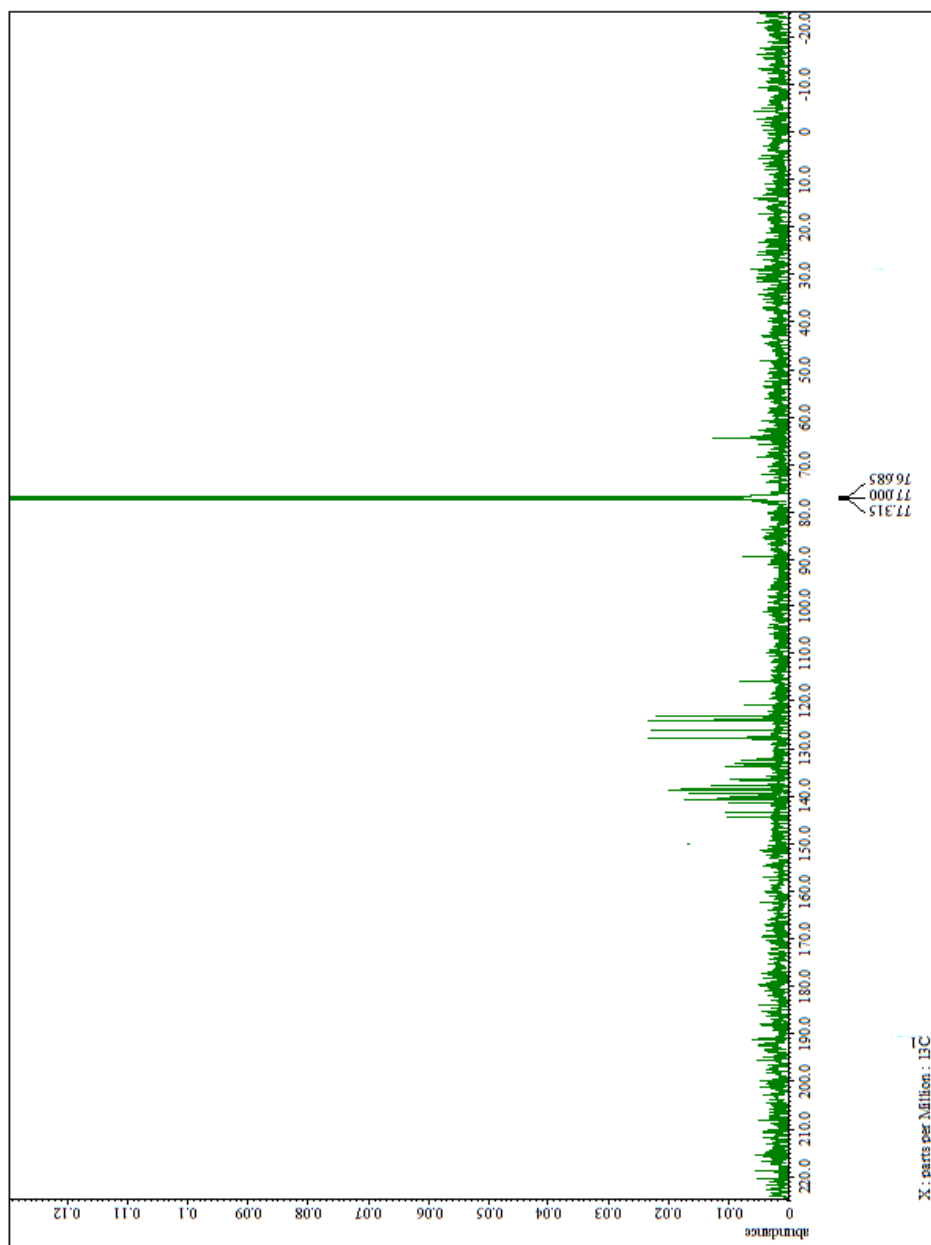

[5,6] isomer of Product **1**  $^{13}\text{C}$  NMR

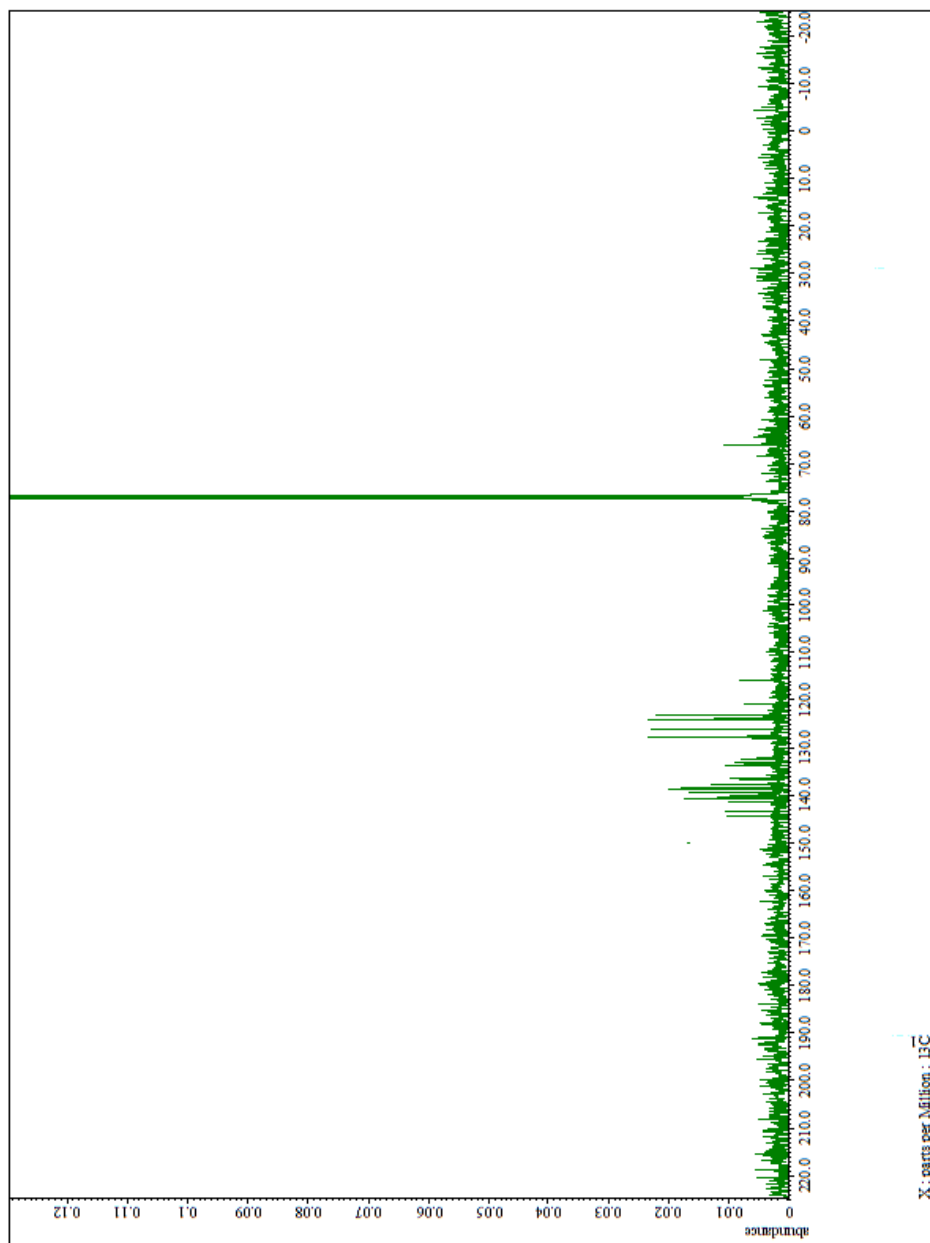

MALDI-TOF MS of Product 1

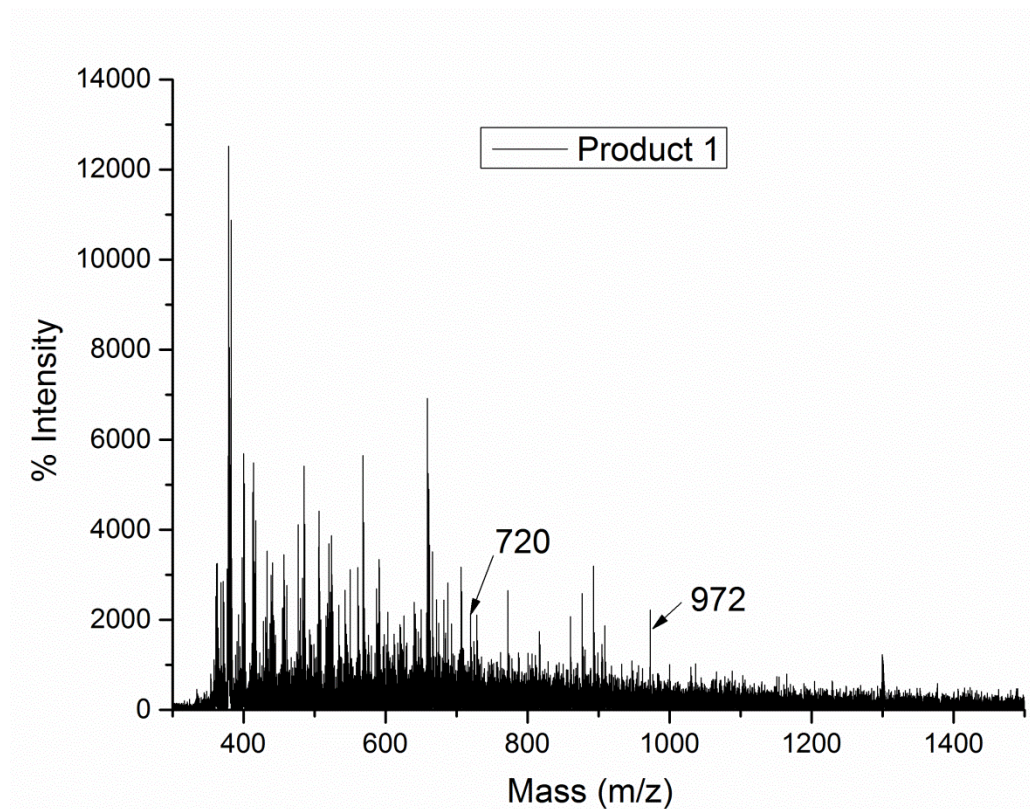

Product 2 <sup>1</sup>H NMR

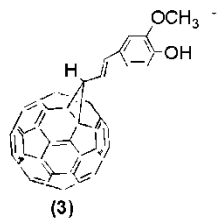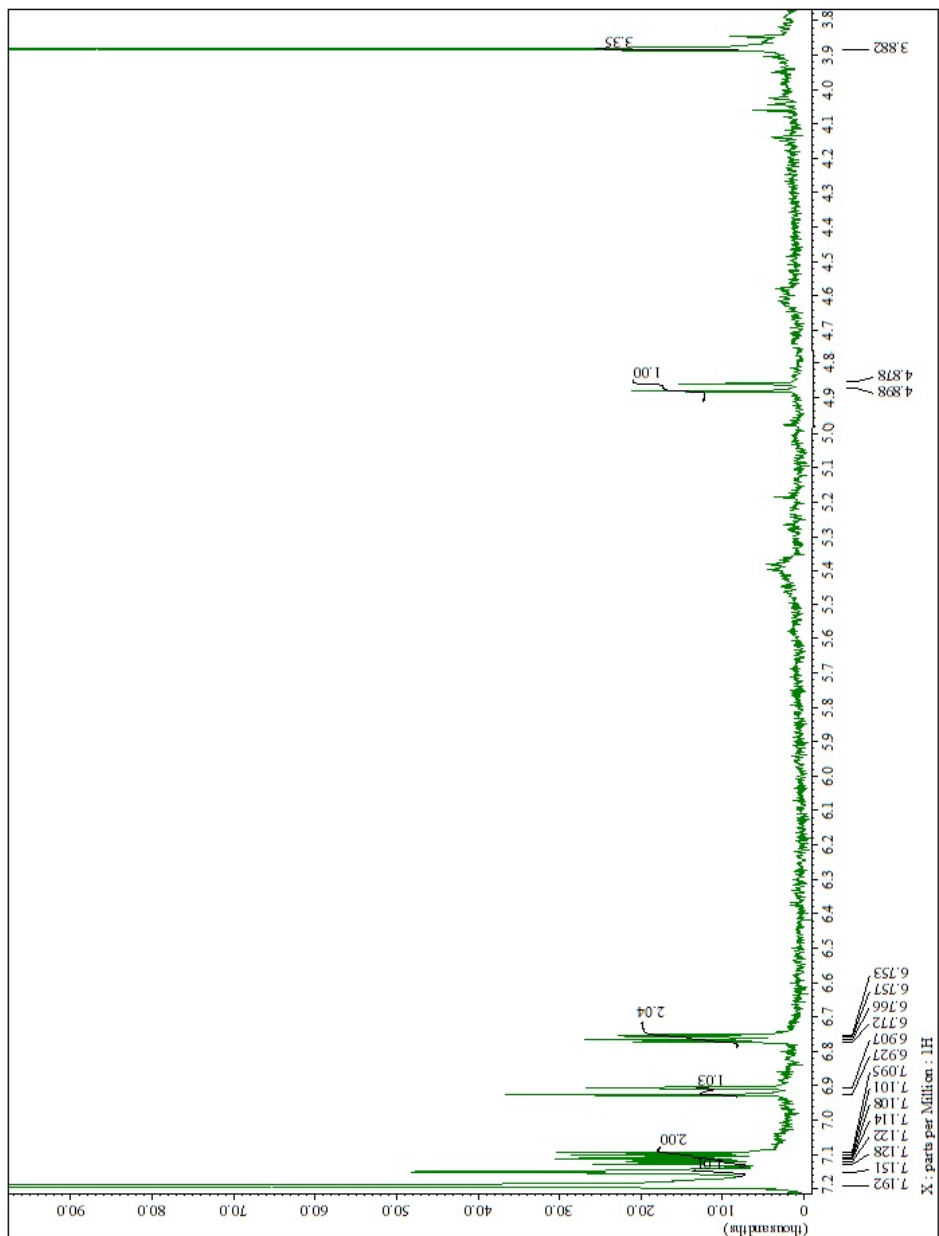

Product **3**  $^{13}\text{C}$  NMR

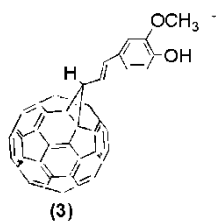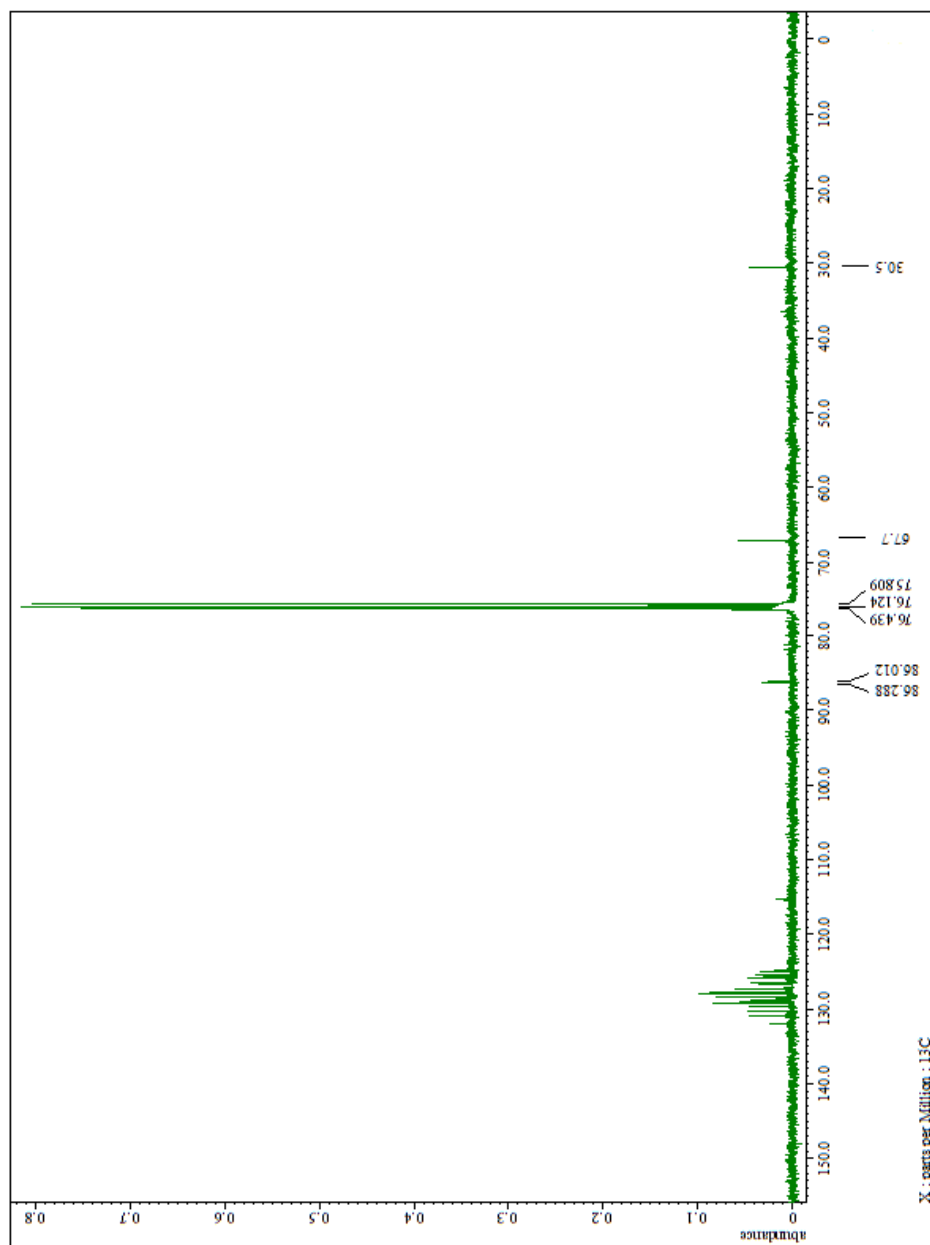

MALDI-TOF MS of Product 3

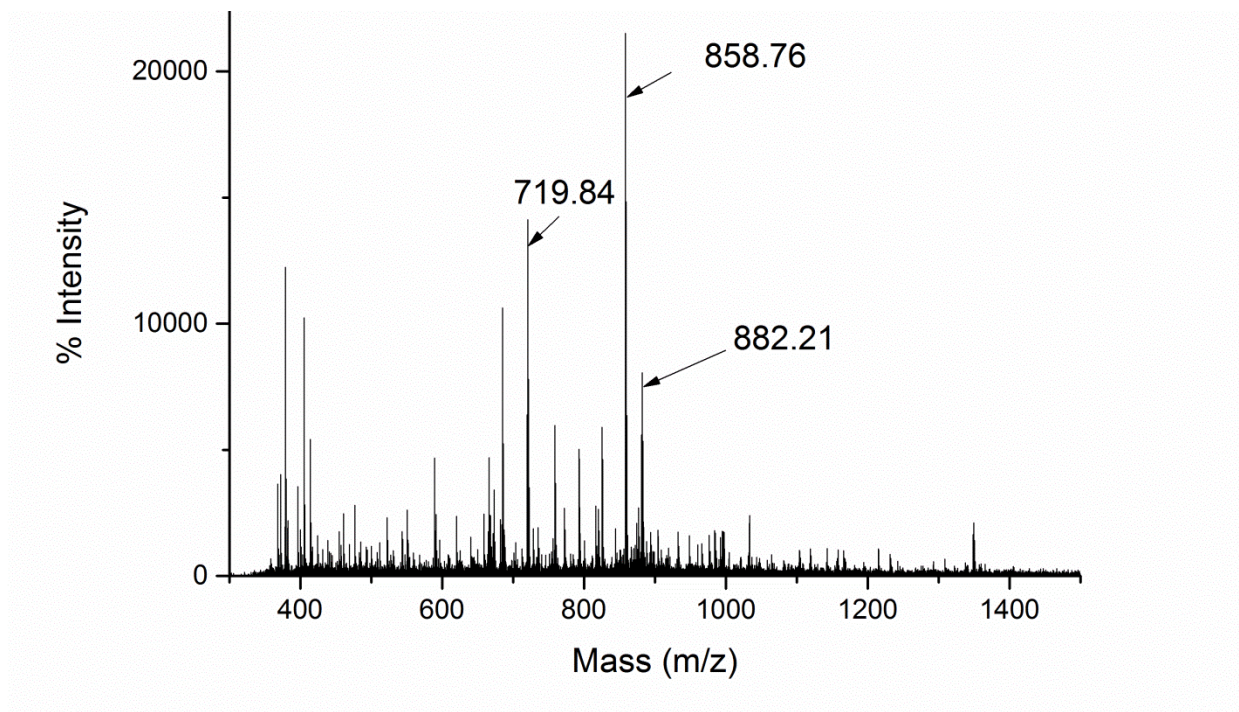

Supplement: c6ra01189f1.pdf [file c6ra01189f1.pdf]
